# Supplementary material for: TGFβ1 mimetic peptide modulates immune response to grass pollen allergens in mice
Source: PubMed Central journal article supplement (PMC7217028; doi:10.1111/all.14108), 2019-12-12
Supplement: ALL-75-882-s002.pdf [file ALL-75-882-s002.pdf]

## huRBL titration curves

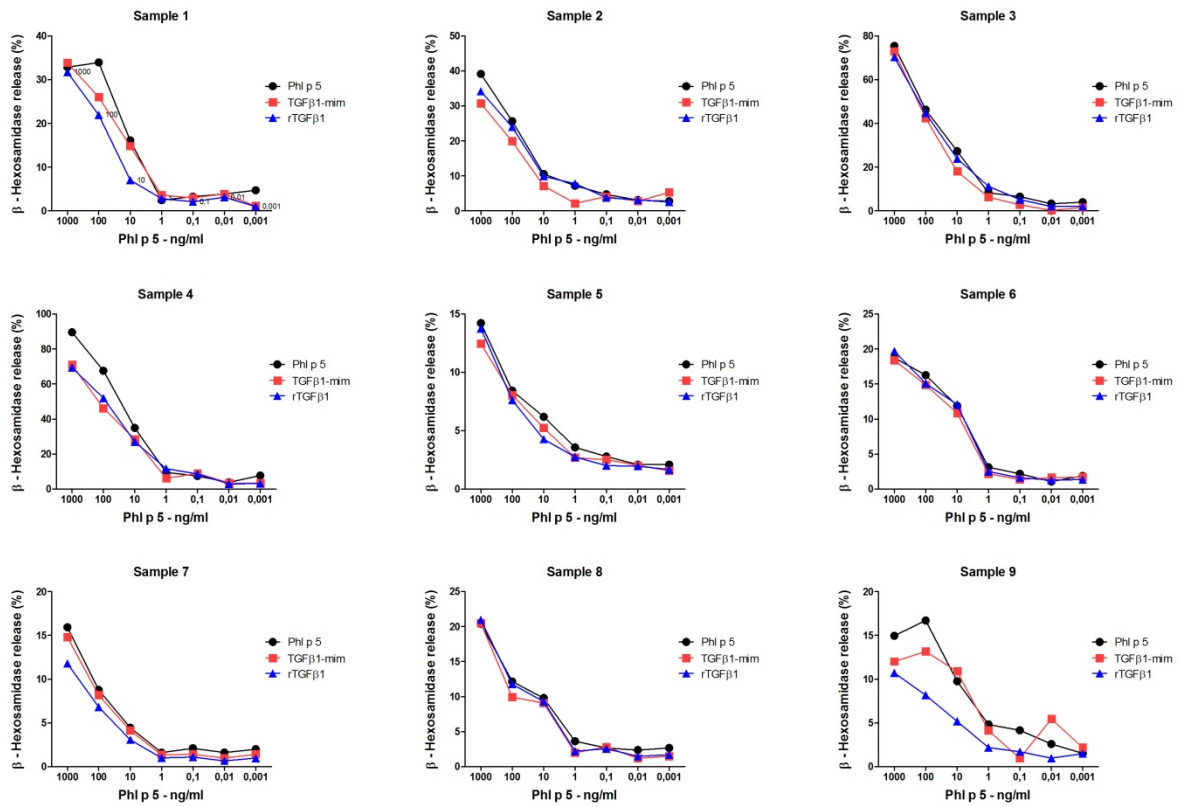

Figure E1. Titration curves of huRBL-2H3 cells encoding the human Fc $\epsilon$ RI receptor. Cells were sensitized overnight with sera from 9 different grass pollen allergic patients, treated for 24 h either with TGF $\beta$ 1-mim peptide or recombinant TGF $\beta$ 1, and then challenged for 1 h with the indicated concentrations of recombinant Phl p 5.
